# Supplementary material for: Assessment of 24-hour physical behaviour in children and adolescents via wearables: a systematic review of free-living validation studies
Source: PubMed Central journal article supplement — BMJ Open Sport Exerc Med. 2022 May 12;8(2):e001267. doi: 10.1136/bmjsem-2021-001267 (PMC9109110; doi:10.1136/bmjsem-2021-001267), 2022-05-12
Supplement: bmjsem-2021-001267supp001.pdf [file bmjsem-2021-001267supp001.pdf]

**Appendix 1.** Characteristics of 24-hour physical behavior.

| <b>Behavior</b>                                                                                                          | <b>SLEEP</b>                                                                                                                                                                                            | <b>PHYSICAL ACTIVITY</b>                                                                                   | <b>SEDENTARY BEHAVIOR</b>                                                                                                                                                           |
|--------------------------------------------------------------------------------------------------------------------------|---------------------------------------------------------------------------------------------------------------------------------------------------------------------------------------------------------|------------------------------------------------------------------------------------------------------------|-------------------------------------------------------------------------------------------------------------------------------------------------------------------------------------|
| <b>Definition</b>                                                                                                        | A naturally recurring and easily reversible state that is characterized by reduced or absent consciousness, perceptual disengagement, immobility, and the adoption of a characteristic sleeping posture | Any voluntary movement produced by skeletal muscles that results in energy expenditure                     | Any waking behavior characterized by an energy expenditure of 1.5 metabolic equivalents (METs; 1 MET = energy expenditure in rest), while in a sitting, reclining, or lying posture |
| <b>Intensity category</b><br>(Individual is sedentary or conducting LPA or MVPA – e.g. differentiated by MET-thresholds) | Sedentary (e.g., ~ 1 MET)                                                                                                                                                                               | Sedentary, LPA, MVPA (e.g., $\geq 1$ MET)                                                                  | Sedentary ( $\leq 1.5$ MET)                                                                                                                                                         |
| <b>Body Posture and/or movement</b><br>(postural location – e.g., differentiated by specific activity types)             | Sitting, reclining, lying                                                                                                                                                                               | Standing, cycling, walking running, wheelchair driving                                                     | Sitting, reclining, lying                                                                                                                                                           |
| <b>Activity type</b>                                                                                                     | e.g., sleep at night, nap                                                                                                                                                                               | e.g. vacuuming, commuting, driving a car                                                                   | e.g. desk work, watching TV                                                                                                                                                         |
| <b>Biological State</b><br>(condition asleep or awake)                                                                   | Asleep                                                                                                                                                                                                  | Awake                                                                                                      | Awake                                                                                                                                                                               |
| <b>Domain</b>                                                                                                            | At home, not at home                                                                                                                                                                                    | Work, home, leisure, transportation                                                                        | Work, home, leisure, transportation                                                                                                                                                 |
| <b>Bout Length</b>                                                                                                       | Short, moderate, Long                                                                                                                                                                                   | Short, moderate, Long                                                                                      | Short, moderate, Long                                                                                                                                                               |
| <b>Outcomes (examples)</b>                                                                                               | Sleep time, sleep-wake metrics, time awake                                                                                                                                                              | Energy expenditure, steps, time spent in different intensity categories, Time spent in standing or walking | Sedentary time, number of sedentary bouts                                                                                                                                           |
