# Supplementary material for: Assessment of 24-hour physical behaviour in children and adolescents via wearables: a systematic review of free-living validation studies
Source: PubMed Central journal article supplement — BMJ Open Sport Exerc Med. 2022 May 12;8(2):e001267. doi: 10.1136/bmjsem-2021-001267 (PMC9109110; doi:10.1136/bmjsem-2021-001267), 2022-05-12
Supplement: bmjsem-2021-001267supp003.pdf [file bmjsem-2021-001267supp003.pdf]

### Appendix 3. Search terms used in EbscoHost, IEEE Explore, PubMed, Scopus and Web of Science databases.

|                       |                                                                                                                                                                                                                                                                                                                                                                                                                                                                                                                                                                                                                                                                                                                                                                                                                                                                                                                                                                                                                                                                                                                                                                                                                                                                                                                                                                                                                                                                                                                                                                                                                                                                                                               |
|-----------------------|---------------------------------------------------------------------------------------------------------------------------------------------------------------------------------------------------------------------------------------------------------------------------------------------------------------------------------------------------------------------------------------------------------------------------------------------------------------------------------------------------------------------------------------------------------------------------------------------------------------------------------------------------------------------------------------------------------------------------------------------------------------------------------------------------------------------------------------------------------------------------------------------------------------------------------------------------------------------------------------------------------------------------------------------------------------------------------------------------------------------------------------------------------------------------------------------------------------------------------------------------------------------------------------------------------------------------------------------------------------------------------------------------------------------------------------------------------------------------------------------------------------------------------------------------------------------------------------------------------------------------------------------------------------------------------------------------------------|
| <b>EbscoHost</b>      | valid* OR reliab* OR accuracy OR precision OR specificity OR sensitivity OR reproduc* OR OR Feasibility OR criterion OR comparability OR "construct validity" OR calibration OR determination OR recognition<br>AND<br>acceleromet* OR "wearable device*" OR "wearable technology" OR "wearable tracker" OR "motion sensor" OR pedomet* OR inclinom* OR "actigraph*" OR "activity monitor*" OR "activity tracker*" OR "motion sensor" OR "motion sensing" OR "heart rate monitor*" OR "fitness tracker*"<br>AND<br>"physical activity" OR "physical fitness" OR walking OR exercis* OR "energy expenditure" "step-count" OR "locomotor activity" OR "ambulatory movement" OR "activity intensity" OR OR "human movement classification" OR "free-living condition" OR locomotion OR "activity patterns" OR sport OR "everyday activities" OR "free-living activites" OR Sedentar* OR sitting OR "sedentary behav*" OR "body postures" OR sleep OR "physical behav*"                                                                                                                                                                                                                                                                                                                                                                                                                                                                                                                                                                                                                                                                                                                                           |
| <b>IEEE Explore</b>   | valid* OR reliab* OR accuracy OR precision OR specificity OR sensitivity OR reproduc*<br>AND<br>acceleromet* OR "wearable" OR pedomet* OR inclinom* OR "activity monitor*" OR "heart rate monitor*" OR "fitness tracker*"<br>AND<br>"physical activity" OR exercis* OR "energy expenditure" "step-count" OR "free-living activites" OR sedentar* OR sleep                                                                                                                                                                                                                                                                                                                                                                                                                                                                                                                                                                                                                                                                                                                                                                                                                                                                                                                                                                                                                                                                                                                                                                                                                                                                                                                                                     |
| <b>Scopus</b>         | (TITLE-ABS-KEY(valid* OR reliab* OR accuracy OR precision OR specificity OR sensitivity OR reproduc* OR feasibility OR criterion OR comparability OR calibration OR determination OR recognition) AND TITLE-ABS-KEY(acceleromet* OR "wearable device*" OR "wearable technology" OR "wearable tracker" OR "motion sensor" OR pedomet* OR inclinom* OR "actigraph*" OR "activity monitor*" OR "activity tracker*" OR "motion sensor" OR "motion sensing" OR "heart rate monitor*" OR "fitness tracker*")) AND TITLE-ABS-KEY("physical activity" OR "physical fitness" OR walking OR exercis* OR "energy expenditure" "step-count" OR "locomotor activity" OR "ambulatory movement" OR "activity intensity" OR "free-living condition" OR locomotion OR "activity patterns" OR sport OR "everyday activities" OR "free-living activites" OR sedentar* OR sitting OR "sedentary behav*" OR "body postures" OR sleep OR "physical behav*")                                                                                                                                                                                                                                                                                                                                                                                                                                                                                                                                                                                                                                                                                                                                                                         |
| <b>PubMed</b>         | ((valid*[Title/Abstract] OR reliab*[Title/Abstract] OR accuracy[Title/Abstract] OR precision[Title/Abstract] OR specificity[Title/Abstract] OR sensitivity[Title/Abstract] OR reproduc*[Title/Abstract] OR feasibility[Title/Abstract] OR criterion[Title/Abstract] OR comparability[Title/Abstract] OR calibration[Title/Abstract] OR determination[Title/Abstract] OR recognition[Title/Abstract]) AND (acceleromet*[Title/Abstract] OR "wearable device*" [Title/Abstract] OR "wearable technology" [Title/Abstract] OR "wearable tracker" [Title/Abstract] OR "motion sensor" [Title/Abstract] OR pedomet*[Title/Abstract] OR inclinom*[Title/Abstract] OR "actigraph*" [Title/Abstract] OR "activity monitor*" [Title/Abstract] OR "activity tracker*" [Title/Abstract] OR "motion sensor" [Title/Abstract] OR "motion sensing" [Title/Abstract] OR "heart rate monitor*" [Title/Abstract] OR "fitness tracker*" [Title/Abstract])) AND ("physical activity" [Title/Abstract] OR "physical fitness" [Title/Abstract] OR walking [Title/Abstract] OR exercis* [Title/Abstract] OR "energy expenditure" "step-count" [Title/Abstract] OR "locomotor activity" [Title/Abstract] OR "ambulatory movement" [Title/Abstract] OR "activity intensity" [Title/Abstract] OR "free-living condition" [Title/Abstract] OR locomotion [Title/Abstract] OR "activity patterns" [Title/Abstract] OR sport [Title/Abstract] OR "everyday activities" [Title/Abstract] OR "free-living activites" [Title/Abstract] OR sedentar* [Title/Abstract] OR sitting [Title/Abstract] OR "sedentary behav*" [Title/Abstract] OR "body postures" [Title/Abstract] OR sleep [Title/Abstract] OR "physical behav*" [Title/Abstract]) |
| <b>Web of Science</b> | (((((TS=(Valid* OR reliab* OR accuracy OR precision OR specificity OR sensitivity OR reproduc* OR feasibility OR criterion OR comparability OR calibration OR determination OR recognition) AND TS=(acceleromet* OR "wearable device*" OR "wearable technology" OR "wearable tracker" OR "motion sensor" OR pedomet* OR inclinom* OR "actigraph*" OR "activity monitor*" OR "activity tracker*" OR "motion sensor" OR "motion sensing" OR "heart rate monitor*" OR "fitness tracker*")) AND TS=( "physical activity" OR "physical fitness" OR walking OR exercis* OR "energy expenditure" "step-count" OR "locomotor activity" OR "ambulatory movement" OR "activity intensity" OR "free-living condition" OR locomotion OR "activity patterns" OR sport OR "everyday activities" OR "free-living activites" OR sedentar* OR sitting OR "sedentary behav*" OR "body postures" OR sleep OR "physical behav*") NOT KP=valid*) NOT KP=reliab*) NOT KP=recog*) NOT KP=feasib*) NOT KP=sensitiv*)                                                                                                                                                                                                                                                                                                                                                                                                                                                                                                                                                                                                                                                                                                                  |
