# Supplementary material for: Assessment of 24-hour physical behaviour in children and adolescents via wearables: a systematic review of free-living validation studies
Source: PubMed Central journal article supplement — BMJ Open Sport Exerc Med. 2022 May 12;8(2):e001267. doi: 10.1136/bmjsem-2021-001267 (PMC9109110; doi:10.1136/bmjsem-2021-001267), 2022-05-12
Supplement: bmjsem-2021-001267supp004.pdf [file bmjsem-2021-001267supp004.pdf]

**Appendix 4.** Overview of excluded studies with reason.

| <b>Reasons for exclusion:</b>                                                                                                                                                                                                                                                                                                 |                   |
|-------------------------------------------------------------------------------------------------------------------------------------------------------------------------------------------------------------------------------------------------------------------------------------------------------------------------------|-------------------|
| 1) Study protocol (e.g., calibration study or laboratory protocol)                                                                                                                                                                                                                                                            |                   |
| 2) No criterion measure was reported                                                                                                                                                                                                                                                                                          |                   |
| 3) Validated outcome                                                                                                                                                                                                                                                                                                          |                   |
| 4) Others (e.g., study population)                                                                                                                                                                                                                                                                                            |                   |
| <b>Study</b>                                                                                                                                                                                                                                                                                                                  | <b>Reason-Nr.</b> |
| Abel, M. G., Hannon, J. C., Eisenman, P. A., Ransdell, L. B., Pett, M., & Williams, D. P. (2009). Waist circumference, pedometer placement, and step-counting accuracy in youth. <i>Research quarterly for exercise and sport</i> , 80(3), 434-444.                                                                           | 1                 |
| Acebo, C., Sadeh, A., Seifer, R., Tzischinsky, O., Hafer, A., & Carskadon, M. A. (2005). Sleep/wake patterns derived from activity monitoring and maternal report for healthy 1-to 5-year-old children. <i>Sleep</i> , 28(12), 1568-1577.                                                                                     | 2                 |
| Adamakis, M. (2020). Criterion validity of wearable monitors and smartphone applications to measure physical activity energy expenditure in adolescents. <i>Sport Sciences for Health</i> , 16(4), 755-763.                                                                                                                   | 1                 |
| Adolph, A. L., Puyau, M. R., Vohra, F. A., Nicklas, T. A., Zakeri, I. F., & Butte, N. F. (2012). Validation of uniaxial and triaxial accelerometers for the assessment of physical activity in preschool children. <i>Journal of physical activity &amp; health</i> , 9(7).                                                   | 1                 |
| Ahmadi, M. N., Brookes, D., Chowdhury, A., Pavey, T., & Trost, S. G. (2020). Free-living Evaluation of Laboratory-based Activity Classifiers in Preschoolers. <i>Medicine and science in sports and exercise</i> , 52(5), 1227-1234.                                                                                          | 3                 |
| Ahmadi, M. N., Pavey, T. G., & Trost, S. G. (2020). Machine learning models for classifying physical activity in free-living preschool children. <i>Sensors</i> , 20(16), 4364.                                                                                                                                               | 3                 |
| Ahmadi, M. N., Chowdhury, A., Pavey, T., & Trost, S. G. (2020). Laboratory-based and free-living algorithms for energy expenditure estimation in preschool children: A free-living evaluation. <i>PloS one</i> , 15(5), e0233229.                                                                                             | 3                 |
| Anderson, C. B., Hagströmer, M., & Yngve, A. (2005). Validation of the PDPAR as an adolescent diary: effect of accelerometer cut points. <i>Medicine and science in sports and exercise</i> , 37(7), 1224-1230.                                                                                                               | 3                 |
| Armbrust, W., Bos, G. J., Geertzen, J. H., Sauer, P. J., Dijkstra, P. U., & Lelieveld, O. T. (2017). Measuring physical activity in juvenile idiopathic arthritis: activity diary versus accelerometer. <i>The Journal of rheumatology</i> , 44(8), 1249-1256.                                                                | 2                 |
| Asaka, Y., & Takada, S. (2011). Comparing sleep measures of infants derived from parental reports in sleep diaries and acceleration sensors. <i>Acta Paediatrica</i> , 100(8), 1158-1163.                                                                                                                                     | 2                 |
| Bammann, K., Sioen, I., Huybrechts, I., Casajus, J. A., Vicente-Rodriguez, G., Cuthill, R., ... & De Henauw, S. (2011). The IDEFICS validation study on field methods for assessing physical activity and body composition in children: design and data collection. <i>International Journal of Obesity</i> , 35(1), S79-S87. | 4                 |
| Berger, I., Obeid, J., Timmons, B. W., & DeMatteo, C. (2017). Exploring accelerometer versus self-report sleep assessment in youth with concussion. <i>Global pediatric health</i> , 4, 2333794X17745973.                                                                                                                     | 2                 |
| Boddy, L. M., Noonan, R. J., Kim, Y., Rowlands, A. V., Welk, G. J., Knowles, Z. R., & Fairclough, S. J. (2018). Comparability of children's sedentary time estimates derived from wrist worn GENEActiv and hip worn ActiGraph accelerometer thresholds. <i>Journal of Science and Medicine in Sport</i> , 21(10), 1045-1049.  | 2                 |
| Borghese, M. M., Tremblay, M. S., LeBlanc, A. G., Leduc, G., Boyer, C., & Chaput, J. P. (2017). Comparison of ActiGraph GT3X+ and Actical accelerometer data in 9–11-year-old Canadian children. <i>Journal of sports sciences</i> , 35(6), 517-524.                                                                          | 2                 |
| Bornstein, D. B., Beets, M. W., Byun, W., Welk, G., Bottai, M., Dowda, M., & Pate, R. (2011). Equating accelerometer estimates of moderate-to-vigorous physical activity: in search of the Rosetta Stone. <i>Journal of Science and Medicine in Sport</i> , 14(5), 404-410.                                                   | 3                 |
| Bossenbroek, L., Gordijn, M., Kosse, N., van der Hoeven, J., ten Hacken, N., & De Greef, M. (2010). Validation of the DynaPort MiniMod during sleep: a pilot study. <i>Perceptual and motor skills</i> , 111(3), 936-946.                                                                                                     | 4                 |
| Brazendale, K., Beets, M. W., Bornstein, D. B., Moore, J. B., Pate, R. R., Weaver, R. G., ... & International Children's Accelerometry Database (ICAD) Collaborators. (2016). Equating accelerometer estimates among youth: The Rosetta Stone 2. <i>Journal of science and medicine in sport</i> , 19(3), 242-249.            | 3                 |
| Brazendale, K., Decker, L., Hunt, E. T., Perry, M. W., Brazendale, A. B., Weaver, R. G., & Beets, M. W. (2019). Validity and wearability of consumer-based fitness trackers in free-living children. <i>International journal of exercise science</i> , 12(5), 471.                                                           | 3                 |
| Brønd, J. C., Grøntved, A., Andersen, L. B., Arvidsson, D., & Olesen, L. G. (2020). Simple method for the objective activity type assessment with preschoolers, children and adolescents. <i>Children</i> , 7(7), 72.                                                                                                         | 1                 |

|                                                                                                                                                                                                                                                                                                                                                   |   |
|---------------------------------------------------------------------------------------------------------------------------------------------------------------------------------------------------------------------------------------------------------------------------------------------------------------------------------------------------|---|
| Buchan, D. S., & McLellan, G. (2019). Comparing physical activity estimates in children from hip-worn Actigraph GT3X+ accelerometers using raw and counts based processing methods. <i>Journal of sports sciences</i> , 37(7), 779-787.                                                                                                           | 2 |
| Burns, R. D., Brusseau, T. A., Fu, Y., & Hannon, J. C. (2016). Establishing school day pedometer step count cut-points using ROC curves in low-income children. <i>Preventive Medicine</i> , 86, 117-122.                                                                                                                                         | 3 |
| Butte, N. F., Wong, W. W., Adolph, A. L., Puyau, M. R., Vohra, F. A., & Zakeri, I. F. (2010). Validation of cross-sectional time series and multivariate adaptive regression splines models for the prediction of energy expenditure in children and adolescents using doubly labeled water. <i>The Journal of nutrition</i> , 140(8), 1516-1523. | 3 |
| Butte, N. F., Wong, W. W., Lee, J. S., Adolph, A. L., Puyau, M. R., & Zakeri, I. F. (2014). Prediction of energy expenditure and physical activity in preschoolers. <i>Medicine and science in sports and exercise</i> , 46(6), 1216.                                                                                                             | 3 |
| Cardon, G., & De Bourdeaudhuij, I. (2007). Comparison of pedometer and accelerometer measures of physical activity in preschool children. <i>Pediatric exercise science</i> , 19(2), 205-214.                                                                                                                                                     | 1 |
| Chandler, J. L., Brazendale, K., Beets, M. W., & Mealing, B. A. (2016). Classification of physical activity intensities using a wrist-worn accelerometer in 8–12-year-old children. <i>Pediatric obesity</i> , 11(2), 120-127.                                                                                                                    | 1 |
| Chandler, J., Beets, M., Saint-Maurice, P., Weaver, R., Cliff, D., Drenowatz, C., ... & Brazendale, K. (2018). Wrist-based accelerometer cut-points to identify sedentary time in 5–11-year-old children. <i>Children</i> , 5(10), 137.                                                                                                           | 3 |
| Chinapaw, M. J., de Niet, M., Verloigne, M., De Bourdeaudhuij, I., Brug, J., & Altenburg, T. M. (2014). From sedentary time to sedentary patterns: accelerometer data reduction decisions in youth. <i>PLoS one</i> , 9(11), e111205.                                                                                                             | 1 |
| Clevenger, K. A., Molesky, M. J., Vusich, J., & Montoye, A. H. (2019). Free-living comparison of physical activity and sleep data from Fitbit activity trackers worn on the dominant and nondominant wrists. <i>Measurement in Physical Education and Exercise Science</i> .                                                                      | 1 |
| Costa, S., Barber, S. E., Cameron, N., & Clemes, S. A. (2014). Calibration and validation of the ActiGraph GT3X+ in 2–3 year olds. <i>Journal of Science and Medicine in Sport</i> , 17(6), 617-622.                                                                                                                                              | 3 |
| Crocker, P. R., Holowachuk, D. R., & Kowalski, K. C. (2001). Feasibility of using the Tritrac motion sensor over a 7-day trial with older children. <i>Pediatric Exercise Science</i> , 13(1), 70-81.                                                                                                                                             | 1 |
| Crotti, M., Fowweather, L., Rudd, J. R., Hurter, L., Schwarz, S., & Boddy, L. M. (2020). Development of raw acceleration cut-points for wrist and hip accelerometers to assess sedentary behaviour and physical activity in 5–7-year-old children. <i>Journal of Sports Sciences</i> , 38(9), 1036-1045.                                          | 3 |
| Crouter, S. E., Horton, M., & Bassett Jr, D. R. (2013). Validity of ActiGraph child-specific equations during various physical activities. <i>Medicine and science in sports and exercise</i> , 45(7), 1403.                                                                                                                                      | 3 |
| Dencker, M., Tanha, T., Wollmer, P., Karlsson, M. K., Andersen, L. B., & Thorsson, O. (2013). Tracking of physical activity with accelerometers over a 2-year time period. <i>Journal of Physical Activity and Health</i> , 10(2), 241-248.                                                                                                       | 1 |
| Dencker, M., Bugge, A., Hermansen, B., & Andersen, L. B. (2010). Objectively measured daily physical activity related to aerobic fitness in young children. <i>Journal of Sports Sciences</i> , 28(2), 139-145.                                                                                                                                   | 1 |
| Dobell, A. P., Eyre, E. L., Tallis, J., Chinapaw, M. J., Altenburg, T. M., & Duncan, M. J. (2019). Examining accelerometer validity for estimating physical activity in pre-schoolers during free-living activity. <i>Scandinavian Journal of Medicine &amp; Science in Sports</i> , 29(10), 1618-1628.                                           | 3 |
| Downs, J., Leonard, H., & Hill, K. (2012). Initial assessment of the StepWatch Activity Monitor™ to measure walking activity in Rett syndrome. <i>Disability and rehabilitation</i> , 34(12), 1010-1015.                                                                                                                                          | 1 |
| Buchan, D. S., & McLellan, G. (2019). Comparing physical activity estimates in children from hip-worn Actigraph GT3X+ accelerometers using raw and counts based processing methods. <i>Journal of sports sciences</i> , 37(7), 779-787.                                                                                                           | 3 |
| Ekelund, U., Åman, J., & Westerterp, K. (2003). Is the ArteACC index a valid indicator of free-living physical activity in adolescents?. <i>Obesity research</i> , 11(6), 793-801.                                                                                                                                                                | 3 |
| Ekelund, U., Yngve, A., Sjöström, M., & Westerterp, K. (2000). Field evaluation of the Computer Science and Application's Inc. activity monitor during running and skating training in adolescent athletes. <i>International journal of sports medicine</i> , 21(08), 586-592.                                                                    | 1 |
| Esbensen, A. J., Hoffman, E. K., Stansberry, E., & Shaffer, R. (2018). Convergent validity of actigraphy with polysomnography and parent reports when measuring sleep in children with Down syndrome. <i>Journal of Intellectual Disability Research</i> , 62(4), 281-291.                                                                        | 1 |
| Fairclough, S. J., Noonan, R. J., Rowlands, A. V., Van Hees, V., Knowles, Z. R., & Boddy, L. M. (2016). Wear Compliance and Activity in Children Wearing Wrist and Hip-Mounted Accelerometers. <i>Medicine &amp; Science in Sport &amp; Exercise</i> , 48(2), 245-253.                                                                            | 1 |
| Faria, F. R., Howe, C. A., Sasaki, J. E., Canabrava, K. L., Guedes, D. P., Marins, J. C. B., ... & Amorim, P. R. S. (2020). Validity and Reliability of a Piezoelectric Pedometer for Measuring Physical Activity in Children. <i>Measurement in Physical Education and Exercise Science</i> , 24(3), 157-164.                                    | 1 |
| Fischer, C., Yildirim, M., Salmon, J., & Paw, M. C. A. (2012). Comparing different accelerometer cut-points for sedentary time in children. <i>Pediatric Exercise Science</i> , 24(2), 220-228.                                                                                                                                                   | 3 |

|                                                                                                                                                                                                                                                                                                               |   |
|---------------------------------------------------------------------------------------------------------------------------------------------------------------------------------------------------------------------------------------------------------------------------------------------------------------|---|
| Floro, J. N., Dunton, G. F., & Delfino, R. J. (2009). Assessing physical activity in children with asthma: convergent validity between accelerometer and electronic diary data. <i>Research quarterly for exercise and sport</i> , 80(2), 153-163.                                                            | 1 |
| Galland, B., Meredith-Jones, K., Gray, A., Sayers, R., Lawrence, J., Taylor, B., & Taylor, R. (2016). Criteria for nap identification in infants and young children using 24-h actigraphy and agreement with parental diary. <i>Sleep Medicine</i> , 19, 85-92.                                               | 2 |
| Garnier, D., & Bénéfice, É. (2006). Reliable method to estimate characteristics of sleep and physical inactivity in free-living conditions using accelerometry. <i>Annals of epidemiology</i> , 16(5), 364-369.                                                                                               | 2 |
| Gnidovec, B., Neubauer, D., & Zidar, J. (2002). Actigraphic assessment of sleep-wake rhythm during the first 6 months of life. <i>Clinical Neurophysiology</i> , 113(11), 1815-1821.                                                                                                                          | 3 |
| Gundle, K. R., Punt, S. E., Mattioli-Lewis, T., & Conrad, E. U. (2017). Can a made-for-consumer activity monitor assess physical activity in adolescents and young adults after lower extremity limb salvage for osseous tumors?. <i>Journal of Pediatric Orthopaedics</i> , 37(3), e192-e196.                | 2 |
| Hagenbuchner, M., Cliff, D. P., Trost, S. G., Van Tuc, N., & Peoples, G. E. (2015). Prediction of activity type in preschool children using machine learning techniques. <i>Journal of Science and Medicine in Sport</i> , 18(4), 426-431.                                                                    | 1 |
| Hager, E. R., Treuth, M. S., Gormely, C., Epps, L., Snitker, S., & Black, M. M. (2015). Ankle accelerometry for assessing physical activity among adolescent girls: threshold determination, validity, reliability, and feasibility. <i>Research quarterly for exercise and sport</i> , 86(4), 397-405.       | 1 |
| Hager, E. R., Gormley, C. E., Latta, L. W., Treuth, M. S., Caulfield, L. E., & Black, M. M. (2016). Toddler physical activity study: Laboratory and community studies to evaluate accelerometer validity and correlates. <i>BMC Public Health</i> , 16(1), 1-10.                                              | 1 |
| Hall, W. A., Liva, S., Moynihan, M., & Saunders, R. (2015). A comparison of actigraphy and sleep diaries for infants' sleep behavior. <i>Frontiers in psychiatry</i> , 6, 19.                                                                                                                                 | 2 |
| Hamari, L., Kullberg, T., Ruohonen, J., Heinonen, O. J., Díaz-Rodríguez, N., Lilius, J., ... & Salanterä, S. (2017). Physical activity among children: objective measurements using Fitbit One® and ActiGraph. <i>BMC Research Notes</i> , 10(1), 1-6.                                                        | 2 |
| Hänggi, J. M., Phillips, L. R., & Rowlands, A. V. (2013). Validation of the GT3X ActiGraph in children and comparison with the GT1M ActiGraph. <i>Journal of science and Medicine in Sport</i> , 16(1), 40-44.                                                                                                | 1 |
| Hanish, A. E., Lin-Dyken, D. C., & Han, J. C. (2017). PROMIS sleep disturbance and sleep-related impairment in adolescents: examining psychometrics using self-report and actigraphy. <i>Nursing research</i> , 66(3), 246.                                                                                   | 1 |
| Hibbing, P. R., Ellingson, L. D., Dixon, P. M., & Welk, G. J. (2018). Adapted Sojourn Models to Estimate Activity Intensity in Youth: A Suite of Tools. <i>Medicine and Science in Sports and Exercise</i> , 50(4), 846-854.                                                                                  | 1 |
| Hibbing, P. R., Bassett, D. R., & Crouter, S. E. (2020). Modifying accelerometer cut-points affects criterion validity in simulated free-living for adolescents and adults. <i>Research quarterly for exercise and sport</i> , 91(3), 514-524.                                                                | 1 |
| Hildebrand, M., Hansen, B. H., van Hees, V. T., & Ekelund, U. (2017). Evaluation of raw acceleration sedentary thresholds in children and adults. <i>Scandinavian journal of medicine &amp; science in sports</i> , 27(12), 1814-1823.                                                                        | 3 |
| Hislop, J., Palmer, N., Anand, P., & Aldin, T. (2016). Validity of wrist worn accelerometers and comparability between hip and wrist placement sites in estimating physical activity behaviour in preschool children. <i>Physiological measurement</i> , 37(10), 1701.                                        | 3 |
| Hjorth, M. F., Chaput, J. P., Damsgaard, C. T., Dalskov, S. M., Michaelsen, K. F., Tetens, I., & Sjödin, A. (2012). Measure of sleep and physical activity by a single accelerometer: can a waist-worn Actigraph adequately measure sleep in children?. <i>Sleep and Biological Rhythms</i> , 10(4), 328-335. | 2 |
| Hustvi, K. M., Normand, M. P., & Larson, T. A. (2011). Behavioral assessment of physical activity in obese preschool children. <i>Journal of Applied Behavior Analysis</i> , 44(3), 635-639.                                                                                                                  | 1 |
| Jun, K., & Choi, S. (2020). Unsupervised end-to-end deep model for newborn and infant activity recognition. <i>Sensors</i> , 20(22), 6467.                                                                                                                                                                    | 4 |
| Kahan, D., Nicaise, V., & Reuben, K. (2013). Convergent validity of four accelerometer cutpoints with direct observation of preschool children's outdoor physical activity. <i>Research quarterly for exercise and sport</i> , 84(1), 59-67.                                                                  | 3 |
| Lamprecht, M. L., Bradley, A. P., Williams, G., & Terrill, P. I. (2015). Temporal associations between arousal and body/limb movement in children with suspected obstructed sleep apnoea. <i>Physiological Measurement</i> , 37(1), 115.                                                                      | 1 |
| Lawal, T. A., Todd, J. J., Elliott, J. S., Linton, M. M., Andres, M., Witherspoon, J. W., ... & Meilleur, K. G. (2020). Assessing Motor Function in Congenital Muscular Dystrophy Patients Using Accelerometry. <i>Journal of Neuroscience Nursing</i> , 52(4), 172-178.                                      | 1 |
| Lee, X. K., Chee, N. I., Ong, J. L., Teo, T. B., van Rijn, E., Lo, J. C., & Chee, M. W. (2019). Validation of a consumer sleep wearable device with actigraphy and polysomnography in adolescents across sleep opportunity manipulations. <i>Journal of Clinical Sleep Medicine</i> , 15(9), 1337-1346.       | 1 |
| Leeger-Aschmann, C. S., Schmutz, E. A., Zysset, A. E., Kakebeeke, T. H., Messerli-Bürgy, N., Stülb, K., ... & Kriemler, S. (2019). Accelerometer-derived physical activity estimation in preschoolers-                                                                                                        | 3 |

|                                                                                                                                                                                                                                                                                                            |   |
|------------------------------------------------------------------------------------------------------------------------------------------------------------------------------------------------------------------------------------------------------------------------------------------------------------|---|
| comparison of cut-point sets incorporating the vector magnitude vs the vertical axis. <i>BMC public health</i> , 19(1), 1-8.                                                                                                                                                                               |   |
| Lunsford-Avery, J. R., Keller, C., Kollins, S. H., Krystal, A. D., Jackson, L., & Engelhard, M. M. (2020). Feasibility and acceptability of wearable sleep electroencephalogram device use in adolescents: Observational Study. <i>JMIR mHealth and uHealth</i> , 8(10), e20590.                           | 1 |
| Macfarlane, D. J., Lee, C. C., Ho, E. Y., Chan, K. L., & Chan, D. (2006). Convergent validity of six methods to assess physical activity in daily life. <i>Journal of Applied Physiology</i> , 101(5), 1328-1334.                                                                                          | 2 |
| Mackintosh, K. A., Fairclough, S. J., Stratton, G., & Ridgers, N. D. (2012). A calibration protocol for population-specific accelerometer cut-points in children. <i>PLoS one</i> , 7(5), e36919.                                                                                                          | 3 |
| Manios, Y., Kafatos, A., & Markakis, G. (1998). Physical activity of 6-year-old children: Validation of two proxy reports. <i>Pediatric Exercise Science</i> , 10(2), 176-188.                                                                                                                             | 3 |
| Mattocks, C., Leary, S., Ness, A., Deere, K., Saunders, J., Tilling, K., ... & Riddoch, C. (2007). Calibration of an accelerometer during free-living activities in children. <i>International Journal of Pediatric Obesity</i> , 2(4), 218-226.                                                           | 1 |
| McGarty, A. M., Penpraze, V., & Melville, C. A. (2016). Calibration and cross-validation of the ActiGraph wGT3X+ accelerometer for the estimation of physical activity intensity in children with intellectual disabilities. <i>PLoS one</i> , 11(10), e0164928.                                           | 1 |
| McLellan, G., Arthur, R., & Buchan, D. S. (2018). Wear compliance, sedentary behaviour and activity in free-living children from hip-and wrist-mounted ActiGraph GT3X+ accelerometers. <i>Journal of Sports Sciences</i> , 36(21), 2424-2430.                                                              | 2 |
| McMinn, D., Rowe, D. A., Stark, M., & Nicol, L. (2010). Validity of the new lifestyles NL-1000 accelerometer for measuring time spent in moderate-to-vigorous physical activity in school settings. <i>Measurement in Physical Education and Exercise Science</i> , 14(2), 67-78.                          | 1 |
| Meltzer, L. J., & Westin, A. M. (2011). A comparison of actigraphy scoring rules used in pediatric research. <i>Sleep medicine</i> , 12(8), 793-796.                                                                                                                                                       | 3 |
| Mitchell, T., Borner, K., Finch, J., Kerr, J., & Carlson, J. (2017). Using activity monitors to measure sit-to-stand transitions in overweight/obese youth. <i>Medicine and science in sports and exercise</i> , 49(8), 1592.                                                                              | 1 |
| Myers, A., Gibbons, C., Butler, E., Dalton, M., Buckland, N., Blundell, J., & Finlayson, G. (2017). A novel integrative procedure for identifying and integrating three-dimensions of objectively measured free-living sedentary behaviour. <i>BMC Public Health</i> , 17(1), 1-9.                         | 2 |
| Nooijen, C. F., De Groot, J. F., Stam, H. J., van den Berg-Emons, R. J., & Bussmann, H. B. (2015). Validation of an activity monitor for children who are partly or completely wheelchair-dependent. <i>Journal of neuroengineering and rehabilitation</i> , 12(1), 1-11.                                  | 1 |
| Noonan, R. J., Boddy, L. M., Kim, Y., Knowles, Z. R., & Fairclough, S. J. (2017). Comparison of children's free-living physical activity derived from wrist and hip raw accelerations during the segmented week. <i>Journal of sports sciences</i> , 35(21), 2067-2072.                                    | 2 |
| Ofstedal, S., Bell, K. L., Davies, P. S., Ware, R. S., & Boyd, R. N. (2014). Validation of accelerometer cut points in toddlers with and without cerebral palsy. <i>Med Sci Sports Exerc</i> , 46(9), 1808-1815.                                                                                           | 3 |
| Pagels, P., Boldemann, C., & Raustorp, A. (2011). Comparison of pedometer and accelerometer measures of physical activity during preschool time on 3-to 5-year-old children. <i>Acta paediatrica</i> , 100(1), 116-120.                                                                                    | 1 |
| Pereira, J. R., Sousa-Sá, E., Zhang, Z., Cliff, D. P., & Santos, R. (2020). Concurrent validity of the ActiGraph GT3X+ and activPAL for assessing sedentary behaviour in 2-3-year-old children under free-living conditions. <i>Journal of Science and Medicine in Sport</i> , 23(2), 151-156.             | 3 |
| Quante, M., Hong, B., von Ash, T., Yu, X., Kaplan, E. R., Rueschman, M., ... & Redline, S. (2021). Associations between parent-reported and objectively measured sleep duration and timing in infants at age 6 months. <i>Sleep</i> , 44(4), zsa217.                                                       | 2 |
| Ridgers, N. D., Salmon, J., Ridley, K., O'Connell, E., Arundell, L., & Timperio, A. (2012). Agreement between activPAL and ActiGraph for assessing children's sedentary time. <i>International Journal of Behavioral Nutrition and Physical Activity</i> , 9(1), 1-8.                                      | 2 |
| Routen, A. C., Upton, D., Edwards, M. G., & Peters, D. M. (2012). Discrepancies in accelerometer-measured physical activity in children due to cut-point non-equivalence and placement site. <i>Journal of sports sciences</i> , 30(12), 1303-1310.                                                        | 2 |
| Saris, W. H. M., & Binkhorst, R. A. (1977). The use of pedometer and actometer in studying daily physical activity in man. Part II: validity of pedometer and actometer measuring the daily physical activity. <i>European Journal of Applied Physiology and Occupational Physiology</i> , 37(3), 229-235. | 4 |
| Schaefer, C. A., Nace, H., & Browning, R. (2014). Establishing wrist-based cutpoints for the actual accelerometer in elementary school-aged children. <i>Journal of Physical Activity and Health</i> , 11(3), 604-613.                                                                                     | 3 |
| Schaefer, C. A., Nigg, C. R., Hill, J. O., Brink, L. A., & Browning, R. C. (2014). Establishing and evaluating wrist cutpoints for the GENEActiv accelerometer in youth. <i>Medicine and science in sports and exercise</i> , 46(4), 826.                                                                  | 3 |
| Schwichtenberg, A. J., Choe, J., Kellerman, A., Abel, E. A., & Delp, E. J. (2018). Pediatric videosomnography: can signal/video processing distinguish sleep and wake states?. <i>Frontiers in pediatrics</i> , 6, 158.                                                                                    | 4 |

|                                                                                                                                                                                                                                                                                                                                                      |   |
|------------------------------------------------------------------------------------------------------------------------------------------------------------------------------------------------------------------------------------------------------------------------------------------------------------------------------------------------------|---|
| Scott, J. J., Rowlands, A. V., Cliff, D. P., Morgan, P. J., Plotnikoff, R. C., & Lubans, D. R. (2017). Comparability and feasibility of wrist-and hip-worn accelerometers in free-living adolescents. <i>Journal of Science and Medicine in Sport</i> , 20(12), 1101-1106.                                                                           | 1 |
| Scruggs, P. W. (2007). A comparative analysis of pedometry in measuring physical activity of children. <i>Medicine and science in sports and exercise</i> , 39(10), 1837-1846.                                                                                                                                                                       | 1 |
| Smith, M. P., Standl, M., Heinrich, J., & Schulz, H. (2017). Accelerometric estimates of physical activity vary unstably with data handling. <i>PLoS One</i> , 12(11), e0187706.                                                                                                                                                                     | 3 |
| Smith, M. P., Horsch, A., Standl, M., Heinrich, J., & Schulz, H. (2018). Uni-and triaxial accelerometric signals agree during daily routine, but show differences between sports. <i>Scientific Reports</i> , 8(1), 1-8.                                                                                                                             | 1 |
| So, K., Michael Adamson, T., & Horne, R. S. (2007). The use of actigraphy for assessment of the development of sleep/wake patterns in infants during the first 12 months of life. <i>Journal of Sleep Research</i> , 16(2), 181-187.                                                                                                                 | 1 |
| Sprengeler, O., Wirsik, N., Hebestreit, A., Herrmann, D., & Ahrens, W. (2017). Domain-specific self-reported and objectively measured physical activity in children. <i>International journal of environmental research and public health</i> , 14(3), 242.                                                                                          | 1 |
| Tang, K. T., Richardson, A. M., Maxwell, D., Spence, W. D., & Stansfield, B. W. (2013). Evaluation of an activity monitor for the objective measurement of free-living physical activity in children with cerebral palsy. <i>Archives of physical medicine and rehabilitation</i> , 94(12), 2549-2558.                                               | 1 |
| Tikotzky, L., & Volkovich, E. (2019). Infant nocturnal wakefulness: a longitudinal study comparing three sleep assessment methods. <i>Sleep</i> , 42(1), zsy191.                                                                                                                                                                                     | 2 |
| Tracy, J. D., Donnelly, T., Sommer, E. C., Heerman, W. J., Barkin, S. L., & Buchowski, M. S. (2021). Identifying bedrest using waist-worn triaxial accelerometers in preschool children. <i>PloS one</i> , 16(1), e0246055.                                                                                                                          | 3 |
| Treiber, F. A., Musante, L., Hartdagan, S., Davis, H., Levy, M., & Strong, W. B. (1989). Validation of a heart rate monitor with children in laboratory and field settings. <i>Medicine and Science in Sports and Exercise</i> , 21(3), 338-342.                                                                                                     | 3 |
| Tremaine, R. B., Dorrian, J., & Blunden, S. (2010). Subjective and objective sleep in children and adolescents: Measurement, age, and gender differences. <i>Sleep and Biological Rhythms</i> , 8(4), 229-238.                                                                                                                                       | 2 |
| Tsai, S. Y., Lee, W. T., Lee, C. C., Jeng, S. F., & Weng, W. C. (2018). Agreement between actigraphy and diary-recorded measures of sleep in children with epilepsy. <i>Journal of Nursing Scholarship</i> , 50(2), 143-150.                                                                                                                         | 2 |
| Tudor-Locke, C., Barreira, T. V., Schuna Jr, J. M., Mire, E. F., & Katzmarzyk, P. T. (2014). Fully automated waist-worn accelerometer algorithm for detecting children's sleep-period time separate from 24-h physical activity or sedentary behaviors. <i>Applied physiology, nutrition, and metabolism</i> , 39(1), 53-57.                         | 3 |
| Van Camp, C. M., & Berth, D. (2018). Further evaluation of observational and mechanical measures of physical activity. <i>Behavioral Interventions</i> , 33(3), 284-296.                                                                                                                                                                             | 3 |
| Van Cauwenberghe, E., Gubbels, J., De Bourdeaudhuij, I., & Cardon, G. (2011). Feasibility and validity of accelerometer measurements to assess physical activity in toddlers. <i>International Journal of Behavioral Nutrition and Physical Activity</i> , 8(1), 1-11.                                                                               | 3 |
| Van Cauwenberghe, E., Wooller, L., Mackay, L., Cardon, G., & Oliver, M. (2012). Comparison of Actical and activPAL measures of sedentary behaviour in preschool children. <i>Journal of Science and Medicine in Sport</i> , 15(6), 526-531.                                                                                                          | 2 |
| Vanderloo, L. M., Di Cristofaro, N. A., Proudfoot, N. A., Tucker, P., & Timmons, B. W. (2016). Comparing the Actical and ActiGraph approach to measuring young children's physical activity levels and sedentary time. <i>Pediatric exercise science</i> , 28(1), 133-142.                                                                           | 2 |
| Vanhelst, J., Béghin, L., Duhamel, A., Bergman, P., Sjöström, M., & Gottrand, F. (2012). Comparison of uniaxial and triaxial accelerometry in the assessment of physical activity among adolescents under free-living conditions: the HELENA study. <i>BMC medical research methodology</i> , 12(1), 1-6.                                            | 2 |
| Welk, G. J., & Corbin, C. B. (1995). The validity of the Tritrac-R3D activity monitor for the assessment of physical activity in children. <i>Research quarterly for exercise and sport</i> , 66(3), 202-209.                                                                                                                                        | 2 |
| Werner, H., Molinari, L., Guyer, C., & Jenni, O. G. (2008). Agreement rates between actigraphy, diary, and questionnaire for children's sleep patterns. <i>Archives of pediatrics &amp; adolescent medicine</i> , 162(4), 350-358.                                                                                                                   | 2 |
| Zhu, Z., Chen, P., & Zhuang, J. (2013). Intensity classification accuracy of accelerometer-measured physical activities in Chinese children and youth. <i>Research Quarterly for Exercise and Sport</i> , 84(sup2), S4-S11.                                                                                                                          | 1 |
| Zijlstra, W. M., Ploegstra, M. J., Vissia-Kazemier, T., Roofthoof, M. T., Sarvaas, G. D. M., Bartelds, B., ... & Berger, R. M. (2017). Physical activity in pediatric pulmonary arterial hypertension measured by accelerometry. A candidate clinical endpoint. <i>American Journal of Respiratory and Critical Care Medicine</i> , 196(2), 220-227. | 1 |
