# Supplementary material for: Assessment of 24-hour physical behaviour in children and adolescents via wearables: a systematic review of free-living validation studies
Source: PubMed Central journal article supplement — BMJ Open Sport Exerc Med. 2022 May 12;8(2):e001267. doi: 10.1136/bmjsem-2021-001267 (PMC9109110; doi:10.1136/bmjsem-2021-001267), 2022-05-12
Supplement: bmjsem-2021-001267supp007.pdf [file bmjsem-2021-001267supp007.pdf]

## Appendix 7. Overview of wearables used in included validation studies.

| Model (Manufacturer)                                                              | Type                                  | Memory/<br>Battery<br>life    | Feedback<br>display<br>(yes/no) | Epoch-<br>length | Dynamic<br>range [g] | Sampling<br>frequency<br>[Hz] | Dimensions<br>(W x D x H)<br>[mm] | Weight<br>[g] | Used<br>in No.<br>Studies |
|-----------------------------------------------------------------------------------|---------------------------------------|-------------------------------|---------------------------------|------------------|----------------------|-------------------------------|-----------------------------------|---------------|---------------------------|
| <b>3dNX accelerometer model v2</b> (BioTel Ltd., Bristol, UK)                     | Research-grade triaxial accelerometer | NR <sup>1</sup>               | No                              | NR               | NR                   | 100                           | 125 x 58 x 8                      | 93            | 1                         |
| <b>3dNX accelerometer model v3</b> (BioTel Ltd., Bristol, UK)                     | Research-grade triaxial accelerometer | Approx. 21 days               | No                              | 5-60 sec         | ± 5.5                | 100                           | 54 x 54 x 18                      | 70            | 1                         |
| <b>Actical accelerometer</b> (Philips Respironics, Inc., Murrysville PA, USA)     | Research-grade triaxial accelerometer | NR                            | No                              | 1, 2, 5 sec      | NR                   | 32                            | 28 x 27 x 10                      | 17            | 3                         |
| <b>ActiGraph AM7164</b> (MTI Health Services, Florida, USA)                       | Research-grade uniaxial accelerometer | 32 MB/4 days                  | No                              | 10 sec           | 0.05-2.13            | 10                            | 51 x 41 x 15                      | 37.8          | 5                         |
| <b>ActiGraph GT1M</b> (ActiGraph, LLC, Pensacola, FL, USA)                        | Research-grade uniaxial accelerometer | 1 MB/14 days                  | No                              | 5 sec            | 0.05-2               | 30                            | 38 x 37 x 18                      | 27            | 7                         |
| <b>ActiGraph GT3X</b> (ActiGraph, LLC, Pensacola, FL, USA)                        | Research-grade triaxial accelerometer | 2 GB/31 days                  | No                              | 1-60 sec         | 0.05-2               | 30 – 100                      | 38 x 37 x 18                      | 27            | 3                         |
| <b>ActiGraph GT3X+</b> (ActiGraph, LLC, Pensacola, FL, USA)                       | Research-grade triaxial accelerometer | 2 GB/31 days                  | No                              | 1-60 sec         | ± 6                  | 30 – 100                      | 46 x 33 x 15                      | 19            | 10                        |
| <b>ActiGraph GT9X</b> (ActiGraph Inc, Pensacola, FL, USA)                         | Research-grade triaxial accelerometer | 4 GB/16 days                  | Yes                             | 1-60 sec         | ± 8                  | 30 - 100                      | 35 x 35 x 10                      | 14            | 2                         |
| <b>Actiheart</b> (CamNtech, Cambridge, UK)                                        | Research-grade triaxial accelerometer | 1 GB/21 days                  | No                              | 15, 30, 60 sec   | ± 2.5                | 100                           | 39.7 x 30.2 x 9.25                | 10.5          | 2                         |
| <b>Actimaker EW4800P</b> (Panasonic Electric Works Co., Ltd, Osaka, Japan)        | Research-grade uniaxial accelerometer | 180 days                      | No                              | 60 sec           | 0-2                  | 20                            | 60 x 35 x 13                      | 24            | 1                         |
| <b>ActivPAL</b> (PAL Technologies Limited, Glasgow, UK)                           | Research-grade triaxial accelerometer | 16 MB/10 days                 | No                              | 15 sec           | ± 2                  | 20                            | 50 x 35 x 7                       | 15            | 3                         |
| <b>ActiTrainer</b> (ActiGraph, LLC, Pensacola, FL, USA)                           | Research-grade uniaxial accelerometer | 4 MB/14 days                  | No                              | 15 sec           | 0.25-2.5             | 30                            | 50 x 40 x 15                      | 45            | 1                         |
| <b>Actiwatch activity monitor</b> (Mini Mitter Company, Inc., Sunriver, OR, USA)  | Research-grade uniaxial accelerometer | NR                            | NR                              | NR               | NR                   | 32                            | 27 x 26 x 9                       | NR            | 1                         |
| <b>Actiwatch Spectrum</b> (Philips Healthcare, Andover, MA, USA)                  | Research-grade uniaxial accelerometer | 1 MB/8 months                 | Yes                             | NR               | 0.5-2                | 32                            | 48 x 37 x 14                      | 30            | 2                         |
| <b>Actiwatch-L</b> (Mini Mitter Co., Inc., Respironics, Inc., Bend, OR)           | Research-grade uniaxial accelerometer | 64 KB/180 days                | Yes                             | 15 sec - 15 min  | NR                   | 32                            | 29 x 37 x 11                      | 16            | 2                         |
| <b>Actiwatch-2</b> (Philips Respironics Inc., Murrysville, PA, USA)               | Research-grade biaxial accelerometer  | 1 MB/30 days (at 1 min epoch) | No                              | NR               | 0.5-2                | 32                            | 43 x 23 x 10                      | 16            | 3                         |
| <b>Actiwatch 64</b> (Mini-Mitter, Inc., Bend, Ore, USA)                           | Research-grade uniaxial accelerometer | 64 KB/180 days                | Yes                             | 15 sec - 15 min  | NR                   | 32                            | 29 x 37 x 12                      | 16            | 1                         |
| <b>Axivity AX3</b> (Axivity Ltd., York, UK)                                       | Research-grade triaxial accelerometer | 512 MB/30 days (with 12.5 Hz) | No                              | NR               | ± 16                 | 12.5 - 3200                   | 23 x 32.5 x 8.9                   | 11            | 1                         |
| <b>Caltrac accelerometer</b> (Muscle Dynamics Fitness network, Torrance, CA, USA) | Research-grade uniaxial accelerometer | NR                            | No                              | NR               | NR                   | NR                            | 70 x 70 x 20                      | 78            | 2                         |

|                                                                                        |                                       |                                   |     |                |           |            |                    |           |   |
|----------------------------------------------------------------------------------------|---------------------------------------|-----------------------------------|-----|----------------|-----------|------------|--------------------|-----------|---|
| <b>CSA accelerometer</b> (Computer Science and Applications, Inc., Shalimar, FL, USA)  | Research-grade uniaxial accelerometer | NR                                | No  | NR             | 0.05-3.2  | 0.25-2.5   | 66 x 43 x 15       | 70        | 2 |
| <b>Dynaport ADL Monitor</b> (McRoberts, Den Haag, Netherlands)                         | Research-grade triaxial accelerometer | 10 MB/1 day                       | No  | 1-60 sec       | 14        | 32         | 125 x 95 x 34      | 295       | 1 |
| <b>Fitbit Charge HR</b> (Fitbit Inc, San Francisco, CA, USA)                           | Consumer-grade triaxial accelerometer | 30 days/5 days                    | Yes | NR             | NR        | NR         | 157.5-193-21 wide) | 30        | 2 |
| <b>Fitbit Flex</b> (Fitbit Inc, San Francisco, CA, USA)                                | Consumer-grade triaxial accelerometer | 5 days/7 days                     | No  | NR             | NR        | NR         | 32 x 12 x 10       | 14.6      | 1 |
| <b>Fitbit Zip</b> (Fitbit Inc, San Francisco, CA, USA)                                 | Consumer-grade triaxial accelerometer | 7 days/6 Months                   | Yes | NR             | NR        | NR         | 28 x 35.5 x 9.65   | 8         | 2 |
| <b>Garmin Vivofit 1</b> (Garmin, Schaffhausen, Switzerland)                            | Consumer-grade triaxial accelerometer | > 1 year                          | Yes | NR             | NR        | NR         | 25.5 x 10          | 25.5      | 1 |
| <b>GENEActiv</b> (ActivInsights Ltd., Cambridgeshire, United Kingdom)                  | Consumer-grade triaxial accelerometer | 500 MB/45 days (at 10 Hz)         | No  | NR             | ± 8       | 1000       | 43 x 40 x 13       | 16        | 3 |
| <b>Kenz Lifecorder</b> (Suzuken, Co., Ltd., Nagoya, Japan)                             | Research-grade triaxial accelerometer | 200 days/6 months                 | Yes | 5 sec - 10 min | 0.06-1.94 | 32         | 72.5 x 41.5 x 27.5 | 60        | 1 |
| <b>Motionlogger Sleepwatch</b> (Ambulatory Monitoring Inc., Ardsley, NY, USA)          | Research-grade triaxial accelerometer | 2 MB/30 days                      | Yes | 1 sec - 10 min | NR        | 10         | 55 x 45 x 18       | 65        | 1 |
| <b>MovBand Model 2</b> (Movband, LLC, Brecksville, OH, USA)                            | Consumer-grade triaxial accelerometer | 40 days                           | Yes | NR             | 2-8       | NR         | NR                 | NR        | 1 |
| <b>New Lifestyle NL-1000</b> (New Lifestyles, Inc., Lee 's Summit, MO, USA)            | Consumer-grade uniaxial accelerometer | 7 days (on instrument) /18 months | Yes | 4 sec /min     | NR        | NR         | 63.5 x 38.1 x 22.2 | 31.2      | 2 |
| <b>Omron HJ-151</b> (Omron Healthcare, Inc., Bannockburn, IL, USA)                     | Consumer-grade uniaxial accelerometer | 7 days (on instrument) /1 year    | Yes | NR             | NR        | NR         | 53 x 25.8          | 35        | 1 |
| <b>Omron Walking Style Pro HJ-720IT</b> (Omron Healthcare, Inc., Bannockburn, IL, USA) | Consumer-grade biaxial accelerometer  | 41 days/ approx. 6 months         | Yes | NR             | NR        | NR         | 47 x 73 x 16       | 37        | 1 |
| <b>Omron Active Style Pro HJA-350IT</b> (Omron Healthcare, Inc., Bannockburn, IL, USA) | Consumer-grade triaxial accelerometer | 4 GB/ NR                          | Yes | 10-60 sec      | ± 6       | 32         | 74x 46 x 34        | 60        | 1 |
| <b>Polar Active Watch</b> (Polar Electro Oy, Kimpel, Finland)                          | Consumer-grade uniaxial accelerometer | 21 days/4 days                    | Yes | 30 sec         | NR        | 0.3-4      | NR                 | 45        | 1 |
| <b>Polar A370</b> (Polar Electro Oy, Kimpel, Finland)                                  | Consumer-grade accelerometer          | 60 hours /4 days                  | Yes | 30 sec         | NR        | 50         | 23.5 x 27 x 13.5   | 31.7-37.3 | 1 |
| <b>Polar Loop</b> (Polar Electro Oy, Kimpel, Finland)                                  | Consumer-grade triaxial accelerometer | 4 Mb/6 days                       | Yes | NR             | NR        | NR         | 145-240 x 20       | 38        | 1 |
| <b>RT3</b> (Stayhealthy, Inc., Monrovia, CA, USA)                                      | Research-grade triaxial accelerometer | 21 days/ 8.5 days                 | No  | 1 - 60 sec     | ± 250     | 0.7 - 5000 | 71 x 56 x 28       | 65.2      | 1 |
| <b>SCA3000</b> (Murata Electronics)                                                    | Research-grade triaxial accelerometer | NR                                | No  | NR             | ± 2       | NR         | NR                 | NR        | 1 |
| <b>SenseWear Pro 2</b> (BodyMedia, Inc., Pittsburgh, PA)                               | Consumer-grade biaxial accelerometer  | NR/2 weeks                        | No  | 60 sec         | NR        | 32         | NR                 | NR        | 1 |
| <b>SenseWear Pro 3</b> (BodyMedia, Pittsburgh, PA, USA)                                | Consumer-grade biaxial accelerometer  | NR/2 weeks                        | No  | NR             | ± 2       | NR         | 85 x 53 x 19       | 79        | 3 |

|                                                                         |                                       |                         |     |            |            |           |                    |       |   |
|-------------------------------------------------------------------------|---------------------------------------|-------------------------|-----|------------|------------|-----------|--------------------|-------|---|
| <b>SenseWear Mini</b> (BodyMedia, Pittsburgh, PA, USA)                  | Consumer-grade triaxial accelerometer | NR                      | No  | NR         | ± 1        | 1         | 86 x 60 x 27       | 45.36 | 1 |
| <b>Sqord</b> (Sqord, Inc, Durham, NC, USA)                              | Research-grade triaxial accelerometer | 7 days/9 months         | No  | 15 min     | NR         | NR        | 60 x 8 x 3         | 113   | 1 |
| <b>Tracmor<sub>p</sub></b> (Philips DirectLife, Amsterdam, Netherlands) | Research-grade triaxial accelerometer | 22 weeks/3 weeks        | No  | 1 min      | NR         | 20        | 32 x 32 x 5        | 12.5  | 1 |
| <b>Tracmor2</b> (Philips Research, Eindhoven, The Netherlands)          | Research-grade triaxial accelerometer | 21 days/NR              | No  | NR         | NR         | 20        | 70 x 28 x 8        | 30    | 1 |
| <b>Tritrac-R3D</b> (Professional Products, Madison, WI, USA)            | Research-grade triaxial accelerometer | 14 days/ NR             | NR  | 1 - 15 min | 0.05 - 6.3 | 0.1 - 3.0 | 120 x 65 x 22      | 170   | 4 |
| <b>Walk4Life MVP</b> (Walk4Life, Inc., Plainfield, IL, USA)             | Consumer pedometer                    | None/NR                 | Yes | NR         | NR         | NR        | 57 x 32 x 13       | NR    | 2 |
| <b>Wristband</b> (NR)                                                   | Consumer-grade triaxial accelerometer | 10 days/approx. 10 days | Yes | NR         | NR         | NR        | 40.3 x 15.7 x 10.5 | 7     | 1 |
| <b>Yamasa EX-200</b> (Yamasa Watch & Clock Co., Ltd., Japan)            | Consumer-grade triaxial accelerometer | NR/7 days               | Yes | NR         | NR         | NR        | 60 x 33 x 11       | 20    | 1 |
| <b>Yamax Digi-Walker SW-701</b> (Yamax Corp., Tokyo, Japan)             | Consumer-grade pedometer              | None/3 years            | Yes | NR         | 0.35-0.50  | NR        | 50 x 38 x 14       | 21    | 1 |
| <b>Yamax Digiwalker SW-200</b> (Yamax Corp., Tokyo, Japan)              | Consumer-grade pedometer              | None/ 3 years           | Yes | NR         | 0.35-0.50  | NR        | 50 x 38 x 14       | 21    | 6 |
| <b>Zamzee</b> (HopeLab non-profit organization, Redwood City, CA, USA)  | Consumer-grade triaxial accelerometer | 1 month /2 weeks        | No  | 10 sec     | NR         | 20        | NR                 | NR    | 1 |

<sup>1</sup>NR: not reported
