# Supplementary material for: Assessment of 24-hour physical behaviour in children and adolescents via wearables: a systematic review of free-living validation studies
Source: PubMed Central journal article supplement — BMJ Open Sport Exerc Med. 2022 May 12;8(2):e001267. doi: 10.1136/bmjsem-2021-001267 (PMC9109110; doi:10.1136/bmjsem-2021-001267), 2022-05-12
Supplement: bmjsem-2021-001267supp008.pdf [file bmjsem-2021-001267supp008.pdf]

## Appendix 8. Risk of bias for the included studies

| Article Number | Author                       | Patient Selection/Study design | Index measure | Criterion measure | Flow & Timing |
|----------------|------------------------------|--------------------------------|---------------|-------------------|---------------|
| 1              | Alghaeed et al., 2013        | HIGH                           | HIGH          | LOW               | HIGH          |
| 2              | Alhassan et al., 2017        | HIGH                           | HIGH          | HIGH              | LOW           |
| 3              | Allor & Pivarnik, 2000       | HIGH                           | HIGH          | HIGH              | HIGH          |
| 4              | Bäcklund et al., 2010        | LOW                            | HIGH          | LOW               | LOW           |
| 5              | Barreira et al., 2015        | HIGH                           | HIGH          | HIGH              | LOW           |
| 6              | Beets et al., 2011           | HIGH                           | HIGH          | HIGH              | HIGH          |
| 7              | Belangér et al., 2013        | HIGH                           | LOW           | LOW               | UNCLEAR       |
| 8              | Bock et al., 2010            | HIGH                           | HIGH          | HIGH              | LOW           |
| 9              | Borghese et al., 2018        | LOW                            | LOW           | HIGH              | HIGH          |
| 10             | Busser et al., 1997          | HIGH                           | HIGH          | LOW               | HIGH          |
| 11             | Byun et al., 2018            | HIGH                           | HIGH          | HIGH              | LOW           |
| 12             | Calabro et al., 2013         | LOW                            | LOW           | LOW               | LOW           |
| 13             | Camerota et al., 2018        | HIGH                           | LOW           | LOW               | LOW           |
| 14             | Carlson et al., 2019         | HIGH                           | LOW           | HIGH              | LOW           |
| 15             | Carter et al., 2008          | HIGH                           | LOW           | LOW               | LOW           |
| 16             | Coe & Pivarnik, 2001         | HIGH                           | HIGH          | HIGH              | LOW           |
| 17             | Costello et al., 2019        | HIGH                           | LOW           | LOW               | LOW           |
| 18             | Crouter et al., 2015         | HIGH                           | HIGH          | LOW               | LOW           |
| 19             | Crouter et al., 2018         | HIGH                           | HIGH          | LOW               | LOW           |
| 20             | Davies et al., 2012          | HIGH                           | HIGH          | LOW               | LOW           |
| 21             | De Craemer et al., 2015      | HIGH                           | HIGH          | HIGH              | HIGH          |
| 22             | De Decker et al., 2013       | HIGH                           | HIGH          | LOW               | LOW           |
| 23             | Djafarian et al., 2013       | HIGH                           | HIGH          | HIGH              | HIGH          |
| 24             | Duncan et al., 2011          | HIGH                           | HIGH          | HIGH              | HIGH          |
| 25             | Etienne et al., 2016         | HIGH                           | HIGH          | HIGH              | LOW           |
| 26             | Finn et al., 2000            | HIGH                           | HIGH          | HIGH              | LOW           |
| 27             | Gao et al., 2010             | HIGH                           | HIGH          | HIGH              | LOW           |
| 28             | Garcia-Prieto et al., 2017   | HIGH                           | HIGH          | LOW               | LOW           |
| 29             | Godino et al., 2020          | HIGH                           | HIGH          | LOW               | LOW           |
| 30             | Grydeland et al., 2014       | HIGH                           | LOW           | HIGH              | HIGH          |
| 31             | Hallal et al., 2013          | LOW                            | LOW           | LOW               | LOW           |
| 32             | Hands et al., 2006           | HIGH                           | HIGH          | HIGH              | HIGH          |
| 33             | Hart et al., 2011            | HIGH                           | HIGH          | HIGH              | HIGH          |
| 34             | Hislop et al., 2012          | HIGH                           | HIGH          | HIGH              | UNCLEAR       |
| 35             | Hoos et al., 2003            | HIGH                           | LOW           | LOW               | LOW           |
| 36             | Hurter et al., 2018          | HIGH                           | LOW           | HIGH              | LOW           |
| 37             | Hurter et al., 2019          | HIGH                           | LOW           | HIGH              | LOW           |
| 38             | Ishikawa-Takata et al., 2013 | LOW                            | LOW           | LOW               | LOW           |
| 39             | Janz, 1994                   | HIGH                           | HIGH          | HIGH              | LOW           |
| 40             | Kim & Lochbaum, 2018         | HIGH                           | HIGH          | HIGH              | HIGH          |
| 41             | Kinder et al., 2012          | HIGH                           | LOW           | HIGH              | HIGH          |
| 42             | Klesges & Klesges, 1987      | HIGH                           | HIGH          | HIGH              | LOW           |
| 43             | Krishnaveni et al., 2009     | LOW                            | HIGH          | HIGH              | LOW           |
| 44             | Krishnaveni et al., 2009     | LOW                            | LOW           | LOW               | LOW           |
| 45             | Kwon et al., 2019            | HIGH                           | HIGH          | LOW               | LOW           |
| 46             | Meltzer & Westin, 2011       | HIGH                           | LOW           | HIGH              | LOW           |
| 47             | Miguelles et al., 2019       | HIGH                           | LOW           | LOW               | LOW           |
| 48             | Mooses et al., 2013          | HIGH                           | HIGH          | HIGH              | LOW           |
| 49             | Nam & Wook Park, 2013        | HIGH                           | HIGH          | LOW               | LOW           |
| 50             | Narayanan et al., 2020       | HIGH                           | HIGH          | LOW               | LOW           |
| 51             | Oijambo et al., 2012         | LOW                            | LOW           | LOW               | LOW           |
| 52             | Oliver et al., 2006          | HIGH                           | HIGH          | HIGH              | LOW           |
| 53             | Pesonen & Kuula, 2018        | HIGH                           | HIGH          | LOW               | UNCLEAR       |
| 54             | Pulakka et al., 2013         | HIGH                           | HIGH          | LOW               | LOW           |
| 55             | Quante et al., 2018          | HIGH                           | LOW           | LOW               | LOW           |
| 56             | Ramirez-Marrero et al., 2018 | HIGH                           | HIGH          | LOW               | LOW           |
| 57             | Reilly et al., 2006          | LOW                            | LOW           | LOW               | LOW           |
| 58             | Rodriguez et al., 2002       | HIGH                           | LOW           | LOW               | LOW           |
| 59             | Rowlands & Eston, 2005       | LOW                            | HIGH          | HIGH              | LOW           |
| 60             | Rowlands et al., 2014        | LOW                            | LOW           | HIGH              | LOW           |
| 61             | Ruch et al., 2011            | HIGH                           | HIGH          | LOW               | LOW           |
| 62             | Santos et al., 2014          | HIGH                           | LOW           | LOW               | LOW           |
| 63             | Schneider et al., 2016       | LOW                            | HIGH          | HIGH              | HIGH          |
| 64             | Sijtsma et al., 2013         | LOW                            | LOW           | LOW               | LOW           |
| 65             | Silva et al., 2019           | LOW                            | HIGH          | HIGH              | HIGH          |
| 66             | Simunek et al., 2019         | LOW                            | LOW           | HIGH              | HIGH          |
| 67             | Sirard et al., 2017          | HIGH                           | HIGH          | HIGH              | LOW           |

|    |                       |      |      |      |      |
|----|-----------------------|------|------|------|------|
| 68 | Sitnick et al., 2008  | HIGH | LOW  | HIGH | LOW  |
| 69 | Smith et al., 2020    | HIGH | LOW  | LOW  | LOW  |
| 70 | Tanaka et al., 2019   | HIGH | HIGH | HIGH | HIGH |
| 71 | Treuth et al., 2003   | LOW  | HIGH | HIGH | HIGH |
| 72 | Unno et al., 2021     | HIGH | HIGH | LOW  | LOW  |
| 73 | Van Hoya et al., 2014 | HIGH | HIGH | HIGH | HIGH |
| 74 | Voss et al., 2017     | LOW  | HIGH | HIGH | HIGH |
| 75 | Welk et al., 1998     | HIGH | HIGH | HIGH | HIGH |
| 76 | Xi et al., 2019       | LOW  | HIGH | HIGH | HIGH |
