# Supplementary figures and images for: Assessment of 24-hour physical behaviour in children and adolescents via wearables: a systematic review of free-living validation studies
Source: PubMed Central journal article supplement — BMJ Open Sport Exerc Med. 2022 May 12;8(2):e001267. doi: 10.1136/bmjsem-2021-001267 (PMC9109110; doi:10.1136/bmjsem-2021-001267), 2022-05-12

**Appendix 5.** Risk of bias: Classification tree for the judgment of overall study quality.

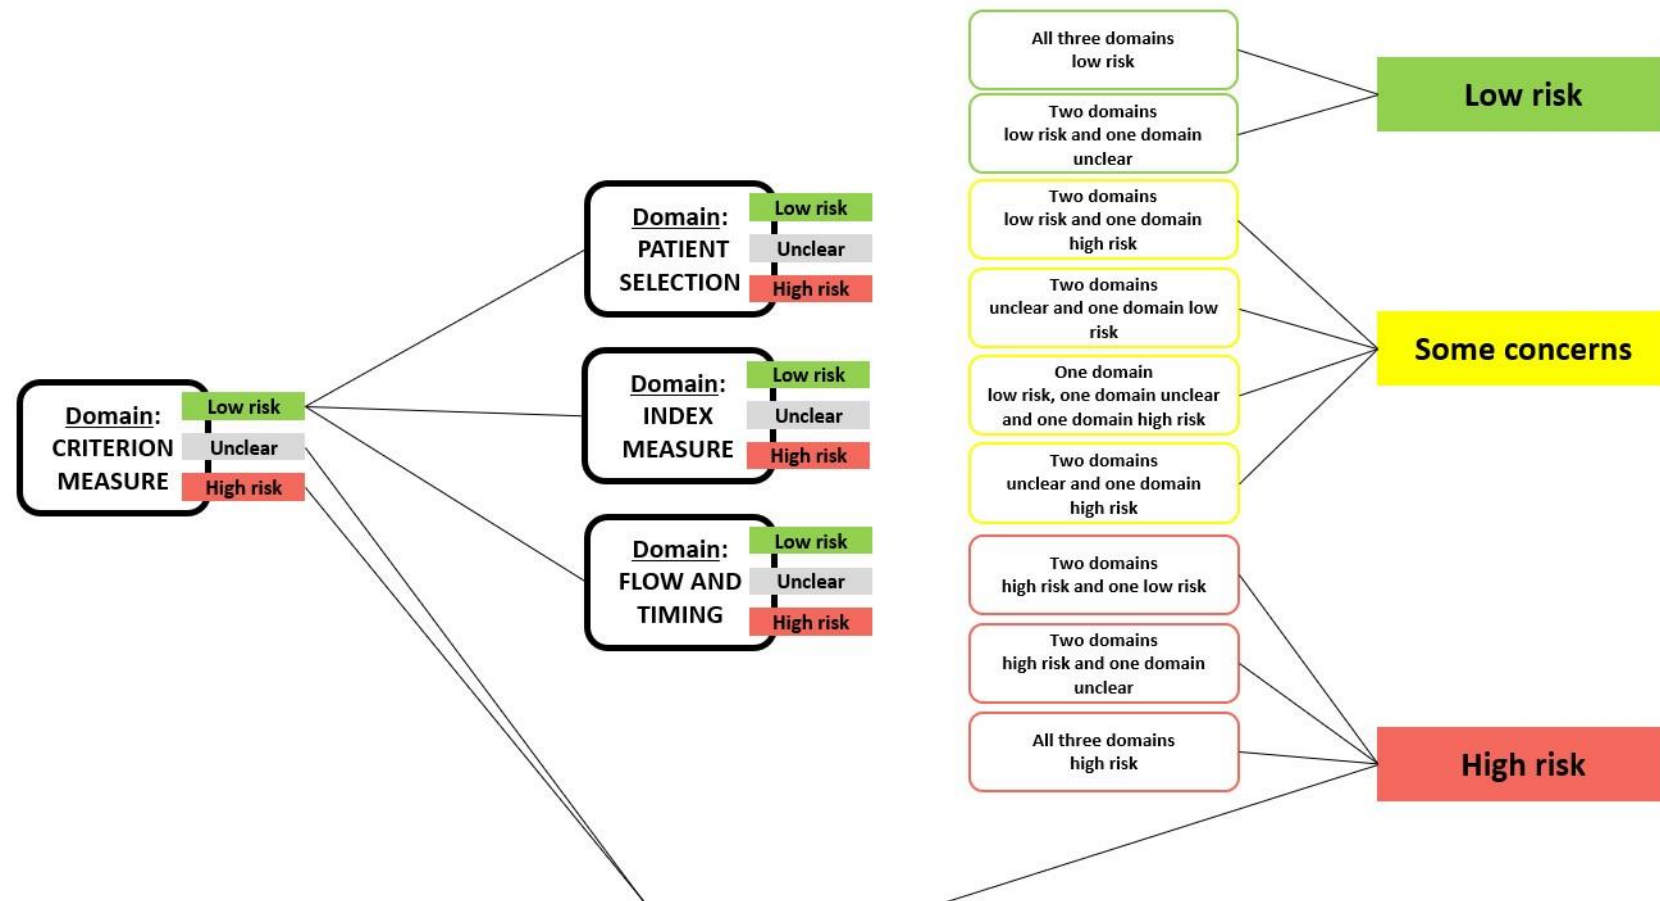

Supplement: bmjsem-2021-001267supp005.pdf [file bmjsem-2021-001267supp005.pdf]
